# Supplementary material for: Identification of a Necroptosis-Related Prognostic Signature and Associated Regulatory Axis in Lung Adenocarcinoma
Source: Hindawi journal article supplement (doi:10.1155/2023/8766311), 2023-02-22

**A**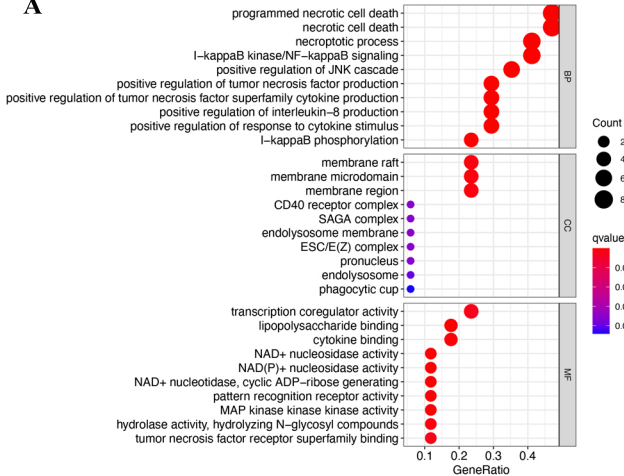**B**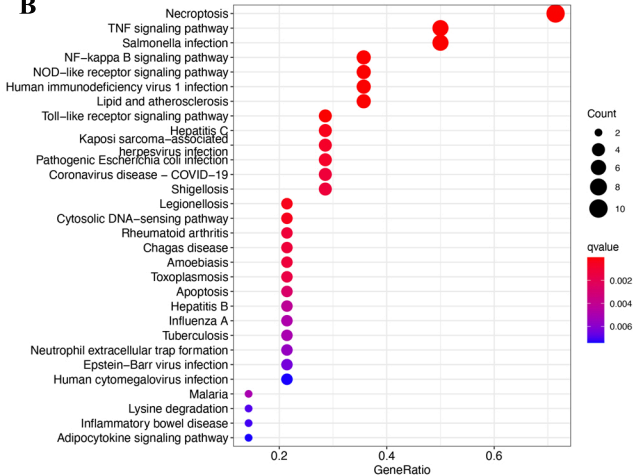

Supplement: f3 [file 8766311.f3.pdf]
