# Supplementary material for: Identification of a Necroptosis-Related Prognostic Signature and Associated Regulatory Axis in Lung Adenocarcinoma
Source: Hindawi journal article supplement (doi:10.1155/2023/8766311), 2023-02-22

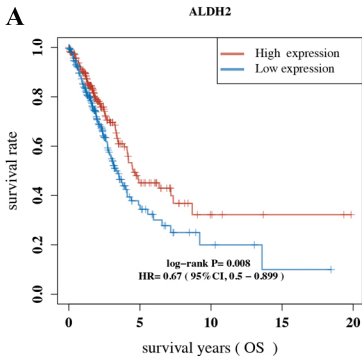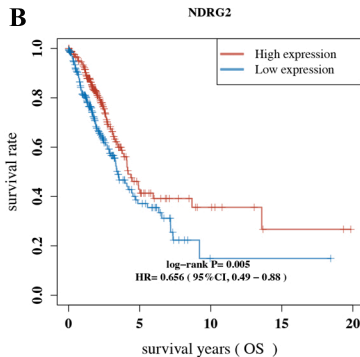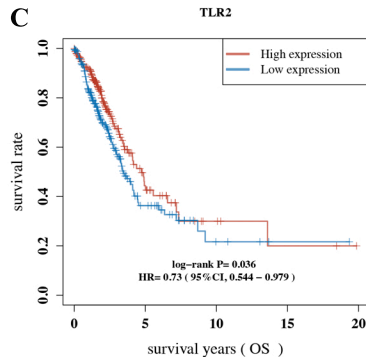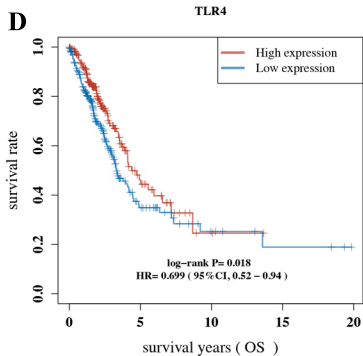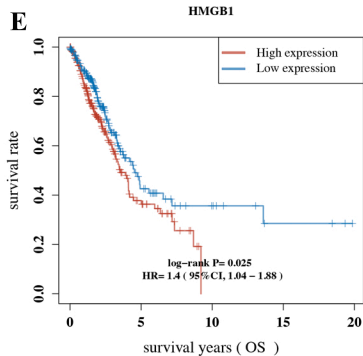

Supplement: f4 [file 8766311.f4.pdf]
